# Supplementary material
Source: HighWire-hosted journal article supplement (https://bmjopen.bmj.com/content/12/4/e057598)
Supplement: inline-supplementary-material-3 [file inline-supplementary-material-3.pdf]

**SUPPLEMENTARY FILE 3: TABLE.** Payment amounts by category compared between the *New England Journal of Medicine (NEJM)* and the *Journal of the American Medical Association (JAMA)*. Amounts shown sum by column to “Total” and by row to “*NEJM + JAMA*.” Percentages shown sum per column. One author published in both journals; this author’s payment amounts (\$35,849.69) were counted once in calculating total general payments but twice (once per journal) for between-journal analysis.

---

| <b>Payment Category</b> | <b><i>NEJM</i></b>        | <b><i>JAMA</i></b>        | <b><i>NEJM + JAMA</i></b> |
|-------------------------|---------------------------|---------------------------|---------------------------|
| <b>Disclosed</b>        | \$2,174,199.92<br>(59.8%) | \$1,675,846.29<br>(47.6%) | \$3,850,046.21<br>(51.3%) |
| <b>Undisclosed</b>      | \$1,399,156.79<br>(38.5%) | \$2,027,672.77<br>(48.3%) | \$3,426,829.56<br>(45.6%) |
| <b>Indeterminate</b>    | \$22,610.21<br>(0.6%)     | \$3,863.42<br>(0.1%)      | \$26,473.63<br>(0.4%)     |
| <b>Unrelated</b>        | \$39,824.89<br>(1.1%)     | \$168,725.27<br>(4.0%)    | \$208,550.16<br>(2.8%)    |
| <b>Total</b>            | \$3,635,791.81<br>(100%)  | \$3,876,107.75<br>(100%)  | \$7,511,899.56<br>(100%)  |

---
